# Supplementary material
Source: MDPI journal article supplement (https://www.mdpi.com/2563-6499/5/1/8)
Supplement: s1 [file s1]

Supplementary Table S1. Haemoglobin (Hb) thresholds for red blood cell transfusion or alternatives usage in adults

| HB Level                      | Suggested Approach                                                                                                   |
|-------------------------------|----------------------------------------------------------------------------------------------------------------------|
| <7 g/dl (non-cardiac patient) | Transfuse 1 red cell unit at a time and test Hb <sup>1</sup>                                                         |
| <8 g/dl (cardiac patient)     | Transfuse 1 red cell unit at a time and test Hb <sup>1</sup>                                                         |
| >7 g/dl but <13 g/dl          | Consider transfusion if symptomatic                                                                                  |
|                               | Check for causes of anaemia:                                                                                         |
|                               | Use intravenous iron if iron deficient (ferritin<30 ng/ml or <100ng/ml and transferrin saturation<20% ) <sup>2</sup> |
|                               | Administer Erythropoietin analogues in chronic kidney disease and malignancy (if iron is replenished) <sup>3</sup>   |
|                               | Control blood loss intraoperatively:                                                                                 |
|                               | Administer tranexamic acid at start and end of surgery <sup>4</sup>                                                  |
|                               | Administer continuous norepinephrine and Ringer's maleate solution <sup>5</sup>                                      |

<sup>1</sup> Yaddanapudi, S. and L. Yaddanapudi, Indications for blood and blood product transfusion.

Indian journal of anaesthesia, 2014. 58(5): p. 538-542.

<sup>2</sup> Muñoz, M., et al., International consensus statement on the peri-operative management of anaemia and iron deficiency. Anaesthesia, 2017. 72(2): p. 233-247

<sup>3</sup> Warner, M.A., et al., Perioperative Anemia: Prevention, Diagnosis, and Management Throughout the Spectrum of Perioperative Care. Anesth Analg, 2020. 130(5): p. 1364-1380.

<sup>4</sup> Zaid, H.B., et al., Efficacy and Safety of Intraoperative Tranexamic Acid Infusion for Reducing Blood Transfusion During Open Radical Cystectomy. Urology, 2016. 92: p. 57-62.

<sup>5</sup> Wuethrich, P.Y., et al., Intraoperative Continuous Norepinephrine Infusion Combined with Restrictive Deferred Hydration Significantly Reduces the Need for Blood Transfusion in

Patients Undergoing Open Radical Cystectomy: Results of a Prospective Randomised Trial.

European Urology, 2014. 66(2): p. 352-360.
